# Supplementary material for: Evolution in Energy-Limited States: A Stoichiometric Model of Lipid Mobilization
Source: Research Square preprint supplement (doi:10.21203/rs.3.rs-7103822/v1), 2025-07-14
Supplement: Supplementary file 1 [file be38060099891f00ac493708.docx]

# Introduction

Fatty acids are broken down to yield ATPs through a process called Beta oxidation. This pathway is central to all human beings and a wide spectrum of living organisms. To generate these ATPs, oxygen atoms are consumed as a part of the process in the final step of the electron transport chain. Hence the efficiency of their breakdown can be conveniently represented as their net P:Oβ-ox ratios.

The process of breakdown through beta oxidation is well laid out and is an integral part of any standard Biochemistry textbook.

# Products of the Beta oxidation cycle

## Even Chain Fatty Acids

1. Acetyl CoA
2. NADH + H+
3. FADH2

## Odd Chain Fatty Acids

1. Acetyl CoA
2. NADH+ + H+
3. FADH2
4. Propionyl CoA

## Fates of the products from Beta oxidation cycle

1. **Acetyl CoA** – This enters the TCA cycle to release 3 NADH+ + H+, 1 FADH2 and 1 GTP. GTP later undergoes a substrate level phosphorylation to release 1 molecule of ATP.
2. **NADH + H+** – This enters the electron transport chain in the mitochondria to yield ATP molecules. Classical assumptions and derivations have shown this to be 3 ATP molecules. However, this value has been recently revised and updated to be 2.5 molecules of ATP[[1]](#footnote-1).
3. **FADH2** – This also enters the electron transport chain in the mitochondria to yield ATP molecules. Classical assumptions and derivations have shown this to be 2 ATP molecules. However, this value has been recently revised and updated to be 1.5 molecules of ATP[[2]](#footnote-2).
4. **Propionyl CoA** – This is converted to Succinyl CoA which later enters the TCA cycle to give 1 molecule of GTP, 1 molecule of NADH + H+, 1 molecule of FADH2. As mentioned above, GTP later undergoes a substrate level phosphorylation to release 1 molecule of ATP.

# Net ATP yield and Oxygen consumption of TCA cycle and Succinyl CoA

## Full Cycle

| **Molecules** | **Amount** | **Regular ATP Yield** | **Hinkle's corrected yield** | **Oxygen atoms consumed** |
| --- | --- | --- | --- | --- |
| NADH + H+ | 3 | 9 | 7.5 | 3 |
| FADH2 | 1 | 2 | 1.5 | 1 |
| Substrate level phosphorylation | 1 | 1 | 1 | 0 |
|  |  | **12** | **10** | **4** |

Table 1- Table showing net ATPs released and oxygen atoms consumed for a complete TCA cycle

## Succinyl CoA

| **Molecules** | **Amount** | **Regular ATP Yield** | **Hinkle's corrected yield** | **Oxygen atoms consumed** |
| --- | --- | --- | --- | --- |
| NADH + H+ | 1 | 3 | 2.5 | 1 |
| FADH2 | 1 | 2 | 1.5 | 1 |
| Substrate level phosphorylation | 1 | 1 | 1 | 0 |
|  |  | **6** | **5** | **2** |

Table 2 - Table showing net ATPs released and oxygen atoms consumed for the completion of the breakdown of Succinyl CoA via the remainder of the TCA cycle

# Net ATP yield and Oxygen consumption of Fatty Acids

## Even Chain Fatty Acids

The following table represents the net ATP yield and the *reducing power* as a function of chain length ‘***n***’. *Reducing power* refers to molecules such as NADH + H+ and FADH2, since they carry hydrogen atoms from the substrates to the electron transport chain that eventually results in the yield of ATP molecules. Each of this molecule results in the consumption of 1 molecule of oxygen atom.

| **Molecules** | **Amount of molecules** | **ATP** | **Oxygen atoms consumed**[[3]](#footnote-3) |
| --- | --- | --- | --- |
| **Priming – Initial** |  | -2 |  |
| **Acetyl CoA** | (n/2) | 12*(n/2) | 4*(n/2) |
| **NADH + H+** | (n/2) – 1 | 3*((n/2)-1) | (n/2)-1 |
| **FADH2** | (n/2) – 1 | 2*((n/2)-1) | (n/2)-1 |

Table 3 - Table showing the products released from the complete breakdown of an even chain fatty acid through the beta oxidation pathway. The net ATPs and Oxygen atoms consumed are represented as a function of the chain length of the fatty acid. This is represented by ‘n’, where n is the number of carbon atoms in the fatty acid chain.

### Net P:Oβ-ox Ratio

#### Net ATPs (Assuming a classic yield)

Given the above products released from a complete cycle of beta oxidation of a fatty acids, the net ATP yield can be, therefore, represented as

*12*(n/2)+3*((n/2)-1)+2*((n/2)-1)-2*

This can be simplified to[[4]](#footnote-4)

##### Equation 1:

**8.5*n-7**

#### Unsaturated Fatty Acids

Introduction of a double removes a step in the beta oxidation cycle that generates a single molecule of NADH + H+. Hence this results in the loss of 2 ATP molecules that could have been generated. Hence if the number of double bonds can be represented as d, then the net ATP yield can be represented as

##### Equation 2:

**8.5*n-2*d-7**

#### Net Oxygen atoms consumed

Following the steps above, the net oxygen atoms consumed as a result of the reducing power entering the electron transport chain can be represented as

*4*(n/2)+((n/2)-1)+ ((n/2)-1)*

This can be simplified to

##### Equation 3:

**3*n-2**

#### Unsaturated Fatty Acids

Introduction of a double removes a step in the beta oxidation cycle that generates a single molecule of NADH + H+. Hence this results in the loss of 2 ATP molecules that could have been generated and hence 1 oxygen atom that could have been consumed. Hence if the number of double bonds can be represented as d, then the net oxygen consumption can be represented as

##### Equation 4:

**3*n-d-2**

Hence the net P:Oβ-ox ratio of any even chain fatty acid can be conveniently represented as

##### Equation 5[[5]](#footnote-5):

**8.5*n-2*d-7
3*n-d-2**

#### Net ATPs (Assuming a Hinkle’s corrected yield)

Taking into consideration, Hinkle’s revised estimates, the net ATP yield can be now represented as

*10*(n/2)+2.5*((n/2)-1)+1.5*((n/2)-1)-2*

This can be simplified to

##### Equation 6:

**7*n-6**

#### Unsaturated Fatty Acids

Introduction of a double removes a step in the beta oxidation cycle that generates a single molecule of NADH + H+. Hence this results in the loss of 2 ATP molecules that could have been generated. Hence if the number of double bonds can be represented as d, then the net ATP yield can be represented as

##### Equation 7:

**7*n-2*d-6**

#### Net Oxygen atoms consumed

Since there is no change in the oxygen atoms consumed, the equation for oxygen consumption essentially remains the same. Hence the net oxygen consumption can be represented as

##### Equation 8:

**3*n-d-2**

Hence the net P:Oβ-ox ratio of any even chain fatty acid can be conveniently represented as

##### Equation 9[[6]](#footnote-6):

**7*n-2*d-6
3*n-d-2**

## Odd Chain Fatty Acids

The following table represents the net ATP yield and the *reducing power* as a function of odd chain length ‘***n***’.

| **Molecules** | **Amount of molecules** | **ATP** | **Oxygen atoms consumed**[[7]](#footnote-7) |
| --- | --- | --- | --- |
| **Priming – Initial** | Reactions | -2 | 0 |
| **Acetyl CoA** | (n-1)/2 – 1 | 12*((n-1)/2 – 1) | 4*((n-1)/2 – 1) |
| **NADH + H+** | (n-1)/2 – 1 | 3*((n-1)/2 – 1) | ((n-1)/2 – 1) |
| **FADH2** | (n-1)/2 – 1 | 2*((n-1)/2 – 1) | ((n-1)/2 – 1) |
| **Propionyl CoA >> Succinyl CoA** | Reactions | -1 | 0 |
| **Succinyl CoA** | 1 | 5 | 2 |

Table 4 - Table showing the products released from the complete breakdown of an odd chain fatty acid through the beta oxidation pathway. The net ATPs and Oxygen atoms consumed are represented as a function of the chain length of the fatty acid. This is represented by ‘n’, where n is the number of carbon atoms in the fatty acid chain.

### Net P:Oβ-ox Ratio

#### Net ATPs (Assuming a classic yield)

Given the above products released from a complete cycle of beta oxidation of a fatty acids, the net ATP yield can be, therefore, represented as

*12*(*(n-1)/2 - 1*)+3*(*(n-1)/2 - 1*)+2*(*(n-1)/2 - 1*)-2-1+6*

This can be simplified to[[8]](#footnote-8)

##### Equation 10:

**8.5*n-22.5**

#### Unsaturated Fatty Acids

Introduction of a double removes a step in the beta oxidation cycle that generates a single molecule of NADH + H+. Hence this results in the loss of 2 ATP molecules that could have been generated. Hence if the number of double bonds can be represented as d, then the net ATP yield can be represented as

##### Equation 11:

**8.5*n-2*d-22.5**

#### Net Oxygen atoms consumed

Following the steps above, the net oxygen atoms consumed as a result of the reducing power entering the electron transport chain can be represented as

*4*(*(n-1)/2 - 1*)+ (*(n-1)/2 - 1*) +(*(n-1)/2 - 1*)+2*

This can be simplified to

##### Equation 12:

**3*n-7**

#### Unsaturated Fatty Acids

Introduction of a double removes a step in the beta oxidation cycle that generates a single molecule of NADH + H+. Hence this results in the loss of 2 ATP molecules that could have been generated and hence 1 oxygen atom that could have been consumed. Hence if the number of double bonds can be represented as d, then the net oxygen consumption can be represented as

##### Equation 13:

**3*n-d-7**

Hence the net P:Oβ-ox ratio of any odd chain fatty acid can be conveniently represented as

##### Equation 14[[9]](#footnote-9):

**8.5*n-2*d-22.5
3*n-d-7**

#### Net ATPs (Assuming a Hinkle’s corrected yield)

Taking into consideration, Hinkle’s revised estimates, the net ATP yield can be now represented as

*10*(*(n-1)/2 - 1*)+2.5*(*(n-1)/2 - 1*)+1.5*(*(n-1)/2 - 1*)-2-1+5*

This can be simplified to

##### Equation 15:

**7*n-19**

#### Unsaturated Fatty Acids

Introduction of a double removes a step in the beta oxidation cycle that generates a single molecule of NADH + H+. Hence this results in the loss of 2 ATP molecules that could have been generated. Hence if the number of double bonds can be represented as d, then the net ATP yield can be represented as

##### Equation 16:

**7*n-2*d-19**

#### Net Oxygen atoms consumed

Since there is no change in the oxygen atoms consumed, the equation for oxygen consumption essentially remains the same. Hence the net oxygen consumption can be represented as

##### Equation 17[[10]](#footnote-10):

**3*n-d-7**

Hence the net P:Oβ-ox ratio of any even chain fatty acid can be conveniently represented as

#####

**7*n-2*d-19
3*n-d-7**

# Net P:Oβ-ox ratios of fatty acids observe the function of a rectangular hyperbola

Regardless of the estimates of the number of ATPs that could be derived from a molecular of NADH + H+ or FADH2(e.g. the classical estimates or Hinkle’s revised estimates), the general equation for the P:Oβ-ox ratio of a fatty acid obeys the following form

Equation 19:

**(A*a+B) = b
(C*a+D)**

Where

- ***A,B,C*** and ***D*** represent the Co-effecients
- ***a*** represents the variable (varying chain length) OR (varying amount of double bonds), keeping either of the two a constant.
- ***b*** represents the resulting P:Oβ-ox ratio

Using basic transformations, the above equation can now be represented in the form of that of a rectangular hyperbola

Equation 20:

**(a-**
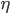
***0*)*(b-**
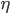
***1*) =**
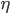
***2***

Where

- a represents the variable
- b represents the resulting P:Oβ-ox ratio , and
-
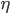
0,
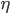
1 and
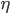
2 represent the constants

## Determining the constants in case of an Even Chain Saturated Fatty Acid

In this case the number of double bonds is zero. Hence the equation is as represented in **equation 5**

**8.5*N -7 = R
3*N -2**

This can be converted to

Equation 21:

**(N - 2/3)*(R - 8.5/3)=-(4/9)**

Where

- N is the number of carbon atoms in the fatty acid chain, and
- R is the resulting P:Oβ-ox ratio

By association of the co-effecients with equation 20, we get

-
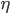
***0*** = 2/3,
-
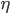
***1*** = 8.5/3 or 2.83 and
-
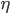
***2*** = -(4/9) or 0.44

As we keep increasing the double bonds, the numerator in
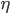
***0*** increments by 1 and the
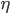
***2*** changes accordingly. However, the
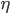
***1*** remains unaffected in any series (number of double bonds = 0,1,2,3 etc) and this represents the limiting P:Oβ-ox ratio that can be achieved by any fatty acid upon complete breakdown by beta oxidation. The
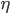
***2*** remains a constant for any series of unsaturated fatty acids.

In a similar fashion the value of
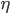
 constants can be established for odd chain fatty acids.

1. Hinkle and Yu, 1979 and Hinkle et.al 1991 – from book Foundations of Modern Biochemistry: Further Milestones in Biochemistry, Volume 3 [↑](#footnote-ref-1)
2. Same as above [↑](#footnote-ref-2)
3. Refer Table 1 [↑](#footnote-ref-3)
4. Besides simplifying these equations manually, there are also FREE online equation simplifiers, solvers and graphers. I used - <http://www.algebra.com/services/rendering/simplifier.mpl> to simplify the equations besides manually checking them. [↑](#footnote-ref-4)
5. A tabular chart of the derivation and the representative values of P:Oβ-ox ratios is available as a spreadsheet. [↑](#footnote-ref-5)
6. A tabular chart of the derivation and the representative values of P:Oβ-ox ratios is available as a spreadsheet. Please [**click here**](https://docs.google.com/spreadsheet/ccc?key=0Aqtrqv2FWSC4dE5IdXEtMjBqYXJiMThIaGkxeURpc2c) to access the same [↑](#footnote-ref-6)
7. Refer Table 1 [↑](#footnote-ref-7)
8. Besides simplifying these equations manually, there are also FREE online equation simplifiers, solvers and graphers. I used - <http://www.algebra.com/services/rendering/simplifier.mpl> to simplify the equations besides manually checking them. [↑](#footnote-ref-8)
9. A tabular chart of the derivation and the representative values of P:Oβ-ox ratios is available as a spreadsheet. [↑](#footnote-ref-9)
10. A tabular chart of the derivation and the representative values of P:Oβ-ox ratios is available as a spreadsheet. Please [**click here**](https://docs.google.com/spreadsheet/ccc?key=0Aqtrqv2FWSC4dE5IdXEtMjBqYXJiMThIaGkxeURpc2c) to access the same [↑](#footnote-ref-10)
